# Supplementary material for: In Vitro Probiotic Properties and In Vivo Anti-Ageing Effects of Lactoplantibacillus plantarum PFA2018AU Strain Isolated from Carrots on Caenorhabditis elegans
Source: MDPI journal article supplement (doi:10.3390/microorganisms11041087), 2023-04-21
Supplement: s1 [file s1]

**Table S1.** Primers for real time qPCR

| Gene          |     | Primer sequence                     |
|---------------|-----|-------------------------------------|
| <i>sek-1</i>  | FOR | 5'-CAGAGCCGTTTATTGGGAAA             |
|               | REV | 5'-TGCATCCGGCTTGTACAGT <sup>1</sup> |
| <i>daf-2</i>  | FOR | 5'-ATCGTCGGATTCTACTGTACTCCC         |
|               | REV | 5'-CCGACATCTGACAATATTCATTCTCGT      |
| <i>sod-3</i>  | FOR | 5'-AGAACCTTCAAAGGAGCTGATG           |
|               | REV | 5'-CCGCAATAGTGATGTCAGAAAG           |
| <i>act-1</i>  | FOR | 5'-GAGCGTGGTTACTCTTTCA              |
|               | REV | 5'-CAGAGCTTCTCCTTGATGTC             |
| <i>gst-4</i>  | FOR | 5'-TCAATGTGCCTTACGAGGATTA           |
|               | REV | 5'-CGAATTGTTCTCCATCGACTTG           |
| <i>skn-1</i>  | FOR | 5'-GTTCCCAACATCCAACACTACG           |
|               | REV | 5'-TGGAGTCTGACCAGTGGATT             |
| <i>daf-16</i> | FOR | 5'-TCAAGACCTCAAAGCCAATCAACTC        |
|               | REV | 5'-ACGAGAAAGAAGGAGTAAGAGGAGG        |
